# Supplementary material for: Horizontal and vertical movements of humpback whales inform the use of critical pelagic habitats in the western South Pacific
Source: PubMed Central journal article supplement (PMC7078318; doi:10.1038/s41598-020-61771-z), 2020-03-17
Supplement: 41598_2020_61771_MOESM1_ESM.pdf [file 41598_2020_61771_MOESM1_ESM.pdf]

# **Horizontal and vertical movements of humpback whales inform the use of critical pelagic habitats in the western South Pacific**

**Derville Solène<sup>1,2,3,4\*</sup>, Torres Leigh G.<sup>4</sup>, Zerbini Alexandre<sup>5</sup>, Oremus Marc<sup>6</sup>, Garrigue Claire<sup>1,2</sup>**

<sup>1</sup> UMR ENTROPIE, (IRD, Université de La Reunion, CNRS, Laboratoire d'excellence-CORAIL), 101 promenade Roger Laroque, BPA5, 98848 Nouméa Cedex, New Caledonia

<sup>2</sup> Operation Cétacés, BP12827, 98802 Nouméa, New Caledonia

<sup>3</sup> Sorbonne Universités, UPMC Univ Paris 06, IFD-ED129, 4 Place Jussieu, 75252 Paris Cedex 05, France

<sup>4</sup> Geospatial Ecology of Marine Megafauna Lab, Marine Mammal Institute, Department of Fisheries and Wildlife, Oregon State University, Newport, HMSC, 2030 SE Marine Science Drive, Oregon 97365, USA

<sup>5</sup> Marine Mammal Laboratory, Alaska Fisheries Science Center, Seattle, Washington, WA, USA

## Supplementary Figures and Tables

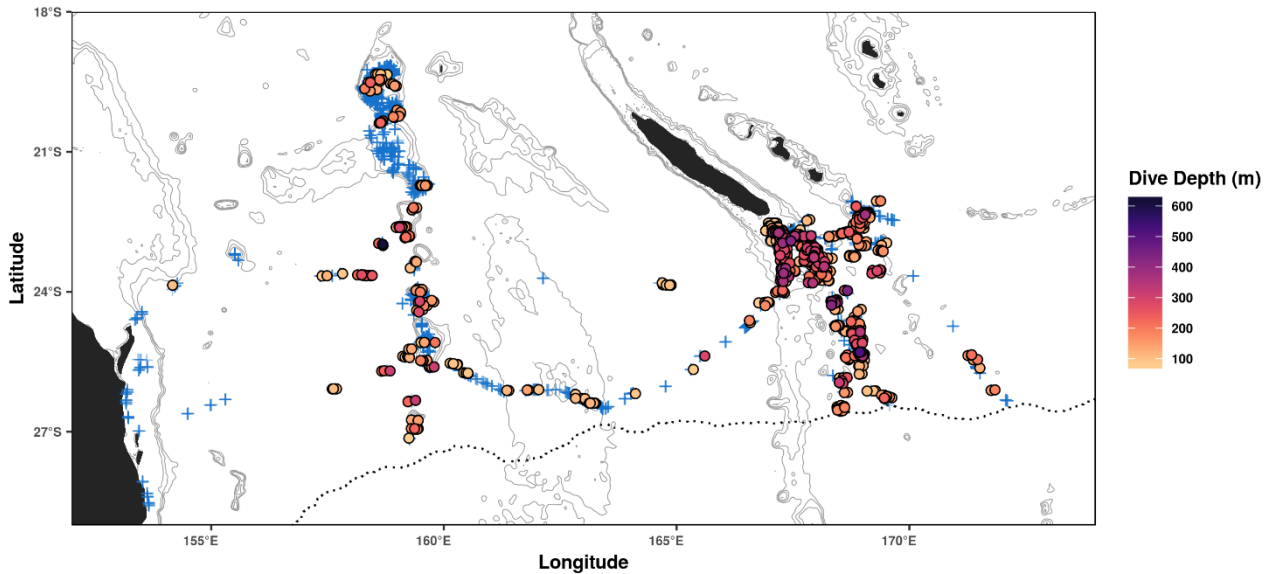

**Figure S1:** Geographic position estimated for dives recorded from 18 humpback whales tagged in New Caledonia ( $n = 7,712$  dives). Dives deeper than 80 meters are represented with filled circles. Shallower dives are represented with blue crosses. Grey lines represent 500 m isobaths up to 2000 m deep. Land is shown in black. The breeding study region is demarcated by the 21°C isotherm shown with a dotted line.

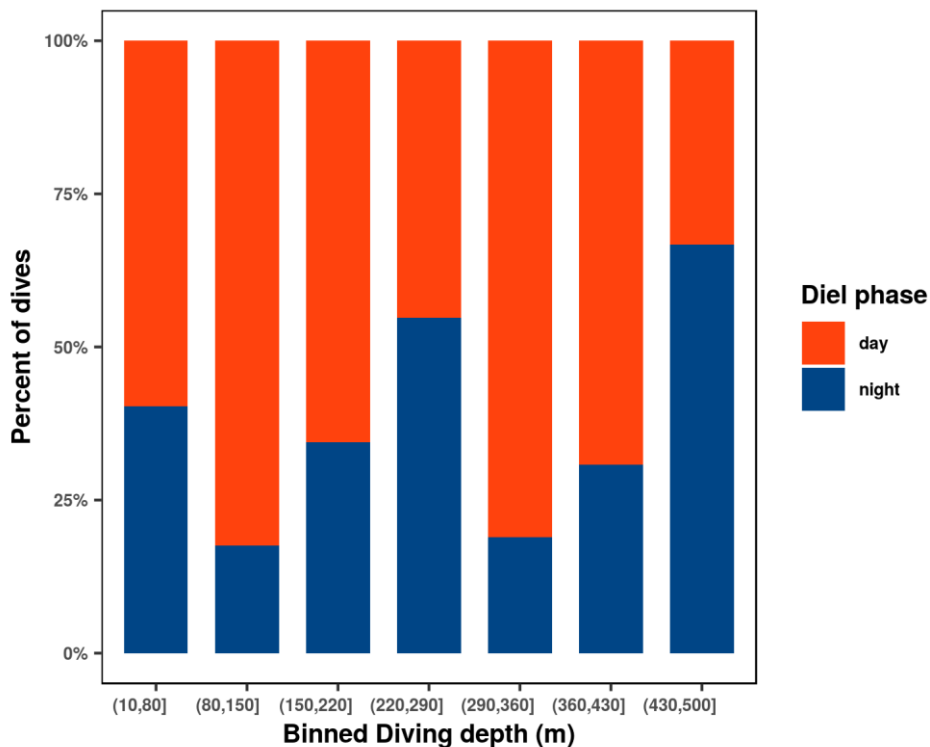

**Figure S2:** Dives recorded as a function of depth (%; all individuals pooled together,  $n = 6,409$  dives) during the day (red) and night (blue)

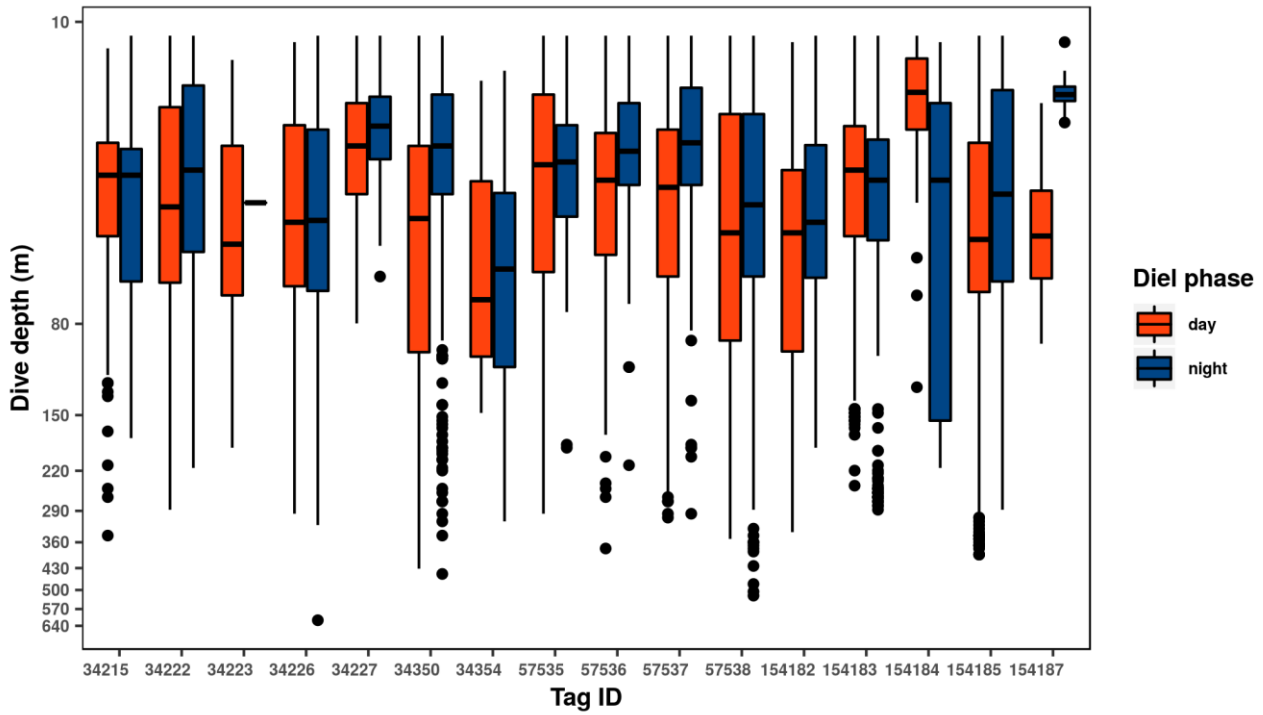

**Figure S3:** Depth of dives recorded at night or during the day per individual tracked in the pelagic breeding region (n = 6,409 dives).

**Table S4:** Technical details about tag deployments conducted between 2016 and 2018 in New Caledonia. Incomplete tag implantation varied from 3 to 10 cm of the tag's length not being implanted.

| ID          | Tag total duration (days) | Latitude at deployment | Longitude at deployment | ARTS pressure (bars) | Tag implantation |
|-------------|---------------------------|------------------------|-------------------------|----------------------|------------------|
| 2016-154182 | 9.8                       | -22.3854               | 169.0127                | 10                   | incomplete       |
| 2016-154183 | 37                        | -22.3665               | 169.0738                | 10.5                 | complete         |
| 2016-154184 | 15.2                      | -22.4265               | 169.0076                | 10                   | incomplete       |
| 2016-154187 | 25.8                      | -22.3362               | 169.0748                | 10.5                 | complete         |
| 2017-34215  | 125.3                     | -23.4003               | 168.0863                | 10                   | incomplete       |
| 2017-154185 | 29                        | -23.4217               | 168.0764                | 10                   | complete         |
| 2017-34222  | 33.8                      | -19.3574               | 158.8189                | 10                   | incomplete       |
| 2017-34223  | 6                         | -19.2689               | 158.8242                | 10                   | complete         |
| 2017-34226  | 46.7                      | -19.3512               | 158.6364                | 11                   | complete         |
| 2017-34227  | 70.5                      | -19.8067               | 158.5894                | 10                   | complete         |
| 2017-34228  | 4.8                       | -19.9434               | 158.4567                | 10                   | incomplete       |
| 2017-34221  | 5.8                       | -20.8925               | 158.9035                | 10                   | incomplete       |
| 2018-34350  | 32.9                      | -23.4064               | 168.0629                | 10                   | incomplete       |
| 2018-34354  | 45                        | -23.4472               | 168.1079                | 11                   | incomplete       |
| 2018-57535  | 8.8                       | -23.4138               | 168.0851                | 10                   | incomplete       |
| 2018-57536  | 21                        | -23.4465               | 168.0765                | 12                   | complete         |
| 2018-57537  | 10.8                      | -23.4073               | 168.0540                | 12                   | complete         |
| 2018-57538  | 54.7                      | -23.4314               | 168.0568                | 12                   | complete         |

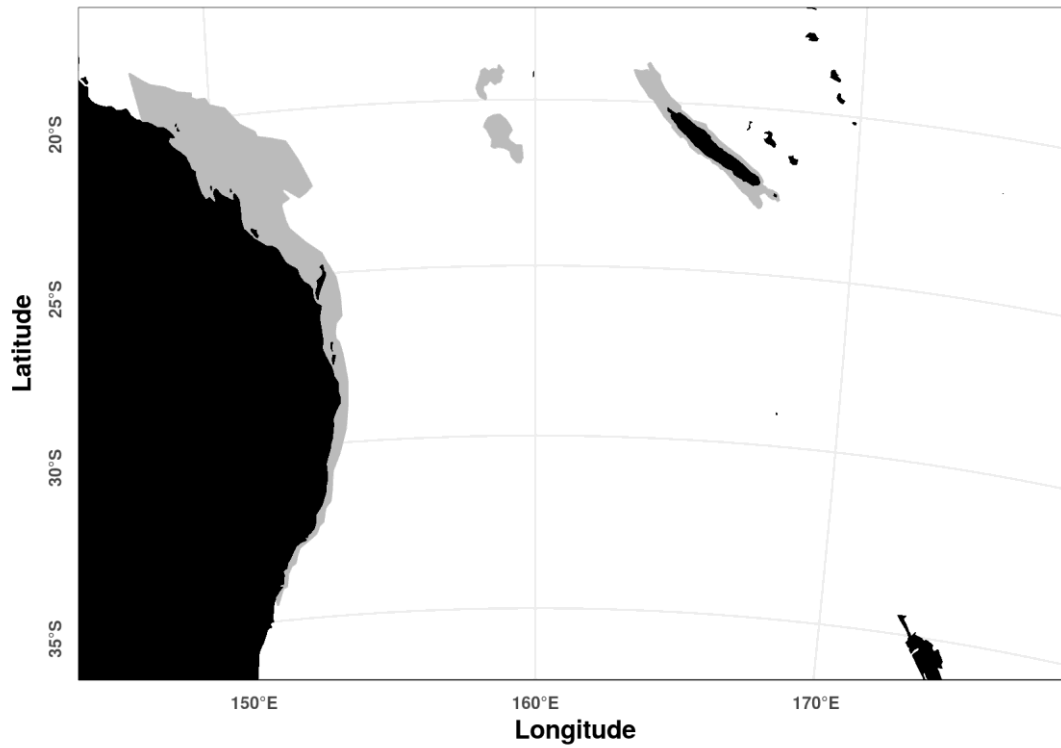

**Figure S5:** Map of sheltered waters excluded from the pelagic habitat movement analyses. Sheltered (coastal or lagoon) waters on the East Australian coast, New Caledonian lagoon and Chesterfield-Bellona lagoon were manually delineated (grey polygons).
